# Supplementary material for: Impact of Surgery on Long-Term Results of Hearing in Neurofibromatosis Type-2 Associated Vestibular Schwannomas
Source: PubMed Central journal article supplement (PMC6770212; doi:10.3390/cancers11091376), 2019-09-16

# Impact of Surgery on Long-Term Results of Hearing in Neurofibromatosis Type-2 Associated Vestibular Schwannomas

Isabel Gugel, Florian Grimm, Marina Liebsch, Julian Zipfel, Christian Teuber, Lan Kluwe, Victor-Felix Mautner, Marcos Tatagiba and Martin Ulrich Schuhmann

**Table S1.** Parameters for the 39 operated VS and associated hearing from 23 young NF2 patients.

| Tumor/<br>Patient ID | Sex | Age at time of<br>surgery (yr) | Resection<br>amount *3 | Preoperative                    |             |            |         |                   | Postoperative *2 |            |         |                   |
|----------------------|-----|--------------------------------|------------------------|---------------------------------|-------------|------------|---------|-------------------|------------------|------------|---------|-------------------|
|                      |     |                                |                        | Hannover-<br>Classification [1] | PTA<br>(dB) | SDS<br>(%) | H-B [2] | BAEP Score<br>[3] | PTA<br>(dB)      | SDS<br>(%) | H-B [2] | BAEP Score<br>[3] |
| 1.1                  | m   | 12                             | 3d                     | T2                              | 10          | 100        | 2       | 1                 | 35               | 82         | 4       | 2                 |
| 1.2                  |     | 8                              | 1                      | T1                              | 28.75       | 100        | 1       | 1                 | 28               | 97         | 1       | 2                 |
| 2.1                  | f   | 12                             | 3c                     | T1                              | 5           | 100        | 1       | 2                 | 5                | 100        | 1       | 2                 |
| 2.2                  |     | 16                             | 3a                     | T2                              | 5           | 100        | 1       | 1                 | 6.25             | 95         | 1       | 2                 |
| 3.1                  | f   | 11, 15 *1                      | 3e, 3a                 | T3a                             | 15          | 70         | 1       | 2                 | 43.75            | 65         | 1       | 2                 |
| 3.2                  |     | 13                             | 2                      | T1                              | 18.25       | 97         | 1       | 2                 | 16.25            | 98         | 1       | 1                 |
| 4.1                  | m   | 12                             | 3d                     | T1                              | 10          | 100        | 2       | 1                 | 10               | 100        | 1       | 2                 |
| 4.2                  |     | 15                             | 3e                     | T3a                             | 10.50       | 100        | 1       | 1                 | deaf             | deaf       | 1       | 5                 |
| 5.1                  | m   | 10                             | 3b                     | T1                              | 11.25       | 72         | 1       | 1                 | 15               | 30         | 1       | 3                 |
| 5.2                  |     | 13                             | 3a                     | T2                              | 41.45       | 45         | 1       | 2                 | 48.75            | 20         | 1       | 2                 |
| 7.1                  | f   | 10                             | 3c                     | T1                              | 5           | 100        | 1       | 2                 | 10               | 100        | 1       | 2                 |
| 7.2                  |     | 11                             | 3b                     | T1                              | 11.25       | 98         | 2       | 2                 | 12.70            | 96         | 1       | 2                 |
| 8.1                  | f   | 13                             | 3a                     | T1                              | 12.25       | 85         | 1       | 5                 | deaf             | deaf       | 1       | 5                 |
| 8.2                  |     | 13                             | 3b                     | T1                              | 5           | 100        | 1       | 3                 | 6.5              | 100        | 1       | 3                 |
| 9.1                  | f   | 11                             | 3c                     | T1                              | 14.70       | 100        | 1       | 1                 | 17.50            | 97         | 1       | 1                 |
| 9.2                  |     | 12                             | 6                      | T1                              | 80          | 0          | 1       | 1                 | 77.5             | 0          | 1       | 1                 |
| 10.1                 | f   | 22                             | 3e                     | T3b                             | 5.5         | 95         | 1       | 2                 | 23               | 81         | 1       | 1                 |
| 10.2                 |     | 23                             | 3e                     | T3a                             | 43          | 73         | 1       | 1                 | 45               | 0          | 1       | 2                 |
| 11.2                 | f   | 18, 22 *1                      | 3c, 5                  | T4a                             | 10.75       | 95         | 1       | 2                 | 47.5             | 95         | 1       | 2                 |
| 12.1                 | f   | 24                             | 3d                     | T4a                             | 12.5        | 99         | 1       | 2                 | 26.25            | 100        | 1       | 2                 |
| 12.2                 |     | 23                             | 3c                     | T3b                             | 15          | 100        | 1       | 2                 | 24.60            | 80         | 1       | 2                 |
| 14.2                 | m   | 15                             | 3d                     | T2                              | 28.75       | 100        | 1       | 1                 | deaf             | deaf       | 1       | 5                 |
| 15.2                 | f   | 12                             | 3c                     | T1                              | 6.25        | 98         | 1       | 1                 | 4                | 100        | 1       | 1                 |
| 19.1                 | f   | 17                             | 4                      | T4a                             | 53.75       | 0          | 1       | 2                 | deaf             | deaf       | 1       | 5                 |
| 21.1                 | m   | 13                             | 3c                     | T1                              | 12.5        | 100        | 1       | 2                 | 10               | 90         | 1       | 2                 |

|      |   |    |    |     |       |     |   |   |       |      |   |   |
|------|---|----|----|-----|-------|-----|---|---|-------|------|---|---|
| 21.2 |   | 12 | 3d | T3a | 6.25  | 95  | 1 | 2 | 6.25  | 100  | 1 | 2 |
| 23.1 | f | 15 | 3c | T3a | 6.5   | 90  | 1 | 2 | 7.5   | 100  | 1 | 2 |
| 23.2 |   | 16 | 3c | T2  | 5     | 100 | 1 | 2 | 17    | 100  | 1 | 2 |
| 24.1 | m | 14 | 3b | T2  | 16.25 | 99  | 1 | 2 | 23.75 | 100  | 1 | 2 |
| 24.2 |   | 13 | 3b | T2  | 14.50 | 100 | 1 | 2 | 6.25  | 100  | 1 | 3 |
| 25.1 | m | 16 | 3a | T2  | 5     | 100 | 1 | 2 | 1.28  | 100  | 1 | 2 |
| 25.2 |   | 16 | 1  | T2  | 1.25  | 100 | 1 | 2 | 3.25  | 100  | 1 | 2 |
| 26.2 | f | 26 | 3c | T3a | 8.75  | 100 | 1 | 2 | 8     | 100  | 1 | 2 |
| 28.1 | f | 23 | 3b | T3a | 48.75 | 58  | 1 | 2 | 47.3  | 0    | 1 | 2 |
| 28.2 |   | 24 | 3a | T4a | 12.5  | 100 | 1 | 2 | 18.75 | 90   | 4 | 2 |
| 35.1 | f | 16 | 3a | T3a | 25    | 91  | 1 | 2 | deaf  | deaf | 1 | 5 |
| 36.1 | m | 22 | 5  | T4a | 40    | 75  | 1 | 4 | deaf  | deaf | 1 | 5 |
| 39.1 | f | 23 | 4  | T3a | 85    | 0   | 2 | 5 | deaf  | deaf | 2 | 5 |
| 39.2 |   | 23 | 3e | T2  | 35    | 30  | 2 | 4 | 30    | 85   | 2 | 3 |

Abbreviations: PTA: pure-tone average; SDS: speech discrimination score; H-B: House and Brackman Grading System [2]; BAEP: brainstem auditory evoked potentials Classification System according to Samii and Matthies et al. [3]; 1 = left-sided tumor; 2 = right-sided tumor. \*1 Tumor 3.1 and 11.2 were operated twice. Data before and after the first surgery was used. \*2 Postop values are evaluated 3 months after surgery. \*3 Resection amount as previously described in Gugel et al. [4].

## References

1. Samii, M.; Matthies, C. Management of 1000 vestibular schwannomas (acoustic neuromas): Hearing function in 1000 tumor resections. *Neurosurgery* **1997**, *40*, 248–260; discussion 260–242.
2. House, J.W.; Brackmann, D.E. Facial nerve grading system. *Otolaryngol Head Neck Surg.* **1985**, *93*, 146–147.
3. Matthies, C.; Samii, M. Management of vestibular schwannomas (acoustic neuromas): The value of neurophysiology for evaluation and prediction of auditory function in 420 cases. *Neurosurgery* **1997**, *40*, 919–929; discussion 929–930.
4. Gugel, I.; Grimm, F.; Teuber, C.; Kluwe, L.; Mautner, V.F.; Tatagiba, M.; Schuhmann, M.U. Management of NF2-associated vestibular schwannomas in children and young adults: Influence of surgery and clinical factors on tumor volume and growth rate. *J. Neurosurg. Pediatr.* **2019**, 1–9, doi:10.3171/2019.6.PEDS1947.

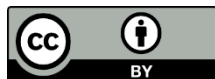

Supplement: cancers-11-01376-s001.pdf [file cancers-11-01376-s001.pdf]
